# Supplementary material for: Sulfur speciation in dacitic melts using X-ray absorption near-edge structure spectroscopy of the S K-edge (S-XANES): Consideration of radiation-induced changes and the implications for sulfur in natural arc systems
Source: publisher site journal article supplement (doi:10.2138/am-2022-8833), 2023-10-26
Supplement: Supplementary file 1 [file am-2022-8833_sm.zip]

## Sheet: Table S1
American Mineralogist: August 2024 Online Materials AM-24-88833 (use tabs to navigate to other tables)
Kleinsasser et al.: Sulfur speciation in dacitic glass using S-XANES
Table S1: EPMA conditions and standards
Analysis	Conditions	Element	X-ray	Spectrometer	Crystal	Peak (µm)	Bg [+] (µm)	Bg [-] (µm)	Peak (sec)	Bg +/- (sec)	Detection limit (ppm)	Standard
Dacitic glass	Condition 1: 6 nA	Na	Kα	Sp. 1	LTAP	46340	-1400	820	5	2.5	804	Albite
		Mg	Kα	Sp. 1	LTAP	38497	-1880	1500	30	15	231	Forsterite
		Si	Kα	Sp. 2	TAP	27745	-760	800	10	5	615	Ferrosillite
		Al	Kα	Sp. 2	TAP	32416	-850	850	10	5	531	Anorthite
		Fe	Kα	Sp. 3	LLIF	48076	-1200	1250	20	10	664	Ferrosillite
		Mn	Kα	Sp. 3	LLIF	52195	-1200	1600	20	10	608	Rhodonite
		K	Kα	Sp. 4	LPET	42772	-530	1100	10	5	423	Adularia
		P	Kα	Sp. 4	LPET	70393	-750	600	30	15	400	Ba-Cl apatite
		Ca	Kα	Sp. 5	PET	38379	-700	700	20	10	451	Wollastonite
		Ti	Kα	Sp. 5	PET	31402	-500	750	20	10	562	Geikielite
	Condition 2: 40 nA	S	Kα	Sp. 4	LPET	61417	-500	500	120	60	50	Celestine
		Cl	Kα	Sp. 5	PET	54057	-600	600	120	60	82	Ba-Cl apatite

## Sheet: Table S2
American Mineralogist: August 2024 Online Materials AM-24-88833 (use tabs to navigate to other tables)
Kleinsasser et al.: Sulfur speciation in dacitic glass using S-XANES
Table S2: Photon flux density estimations
Beamline	Point	Beam size, µm	Total scans	Total time, sec	First n scans	First n time, sec	Beam area, µm2	Flux density, pht/sec/µm2	First n dose, pht/µm2	Total dose, pht/µm2
NSLS-II	QD2-5_7	4 x 8	100	10500	15	1575	32	20000000	31500000000	210000000000
	QD9-4_1	5 x 10	15	1575	3	315	50	20000000	6300000000	31500000000
	QD9-4_2step	5 x 10	14	40320	1	2880	50	20000000	57600000000	806400000000
	QD6-4_12	4 x 8	63	6615	15	1575	32	20000000	31500000000	132300000000
	QD10-1_1	5 x 10	94	9870	20	2100	50	20000000	42000000000	197000000000
	QD10-1_2	5 x 10	41	4305	20	2100	50	20000000	42000000000	86100000000
	QD8-4_1	5 x 10	44	4620	20	2100	50	20000000	42000000000	92400000000
	QD8-4_2	7 x 14	25	2625	20	2100	98	20000000	42000000000	52500000000
	QD1-4_6	4 x 8	30	3150	30	3150	32	20000000	63000000000	63000000000
	QD1-4_7	4 x 8	96	10080	20	2100	32	20000000	42000000000	202000000000
APS	QD2-5 avg	2 x 2	2	1080	1	540	4	2719673500	1468623690000	2937247380000
	QD9-3 avg	2 x 2	2	1080	1	540	4	5619427500	3034490850000	6068981700000
	QD6-4 avg	2 x 2	2	1080	1	540	4	2784275000	1503508500000	3007017000000
	QD10-1 avg	2 x 2	2	1080	1	540	4	5692522500	3073962150000	6147924300000
	QD8-4 avg	2 x 2	2	1080	1	540	4	1412928000	762981120000	1525962240000
	QD1-4 avg	2 x 2	2	1080	1	540	4	1787813125	965419087500	1930838175000
	QD3-5 avg	2 x 2	2	1080	1	540	4	2.08874e+09	1127921400000	2255842800000
	QD4-6 avg	2 x 2	2	1080	1	540	4	2446738750	1321238925000	2642477850000
	QD7-3 avg	2 x 2	2	1080	1	540	4	3038521250	1640801475000	3281602950000
SLS	QD2-5, QD6-4, QD1-4, QD3-5	3 x 3	3	2160	1	720	9	1.0–4.5E+10	7.2E+12–3.24E+13	2.16–9.72E+13
		4 x 4	3	2160	1	720	16	1.0–4.5E+10	7.2E+12–3.24E+13	2.16–9.72E+13
	QD4-6, QD7-3	3 x 3	2	1440	1	720	9	1.0–4.5E+10	7.2E+12–3.24E+13	1.44–6.48E+13
		4 x 4	2	1440	1	720	16	1.0–4.5E+10	7.2E+12–3.24E+13	1.44–6.48E+13

## Sheet: Table S3
American Mineralogist: August 2024 Online Materials AM-24-88833 (use tabs to navigate to other tables)
Kleinsasser et al.: Sulfur speciation in dacitic glass using S-XANES
Table S3: Peak positions used in S6+/ΣS calculations
Date analyzed	Beamline	ΔFMQ	Sample name	EMG inflection	S2- sharp peak			S2- broad peak			S4+ peak			S6+ peak			Sum areas	Peak area/total
					area	center	height	area	center	height	area	center	height	area	center	height		S6+	S4+	S2-
Jan 2020	SLS	3.3	QD2-5r_1_01	2474.43	0.5713	2469.66	0.2704	2.0466	2474.78	0.3618	0.104	2477.26	0.108	7.726	2481.73	3.77	10.4479	0.739479	0.00995415	0.250567
Jan 2020	SLS		QD2-5r_1_02	2474.39	0.6689	2469.61	0.3114	1.9265	2474.29	0.3582	0.2142	2477.15	0.1381	7.48	2481.73	3.666	10.2896	0.726948	0.0208171	0.252235
Jan 2020	SLS		QD2-5r_1_03	2475.12	0.6607	2469.61	0.2944	1.9808	2474.06	0.3743	0.267	2477	0.1389	7.6326	2481.74	3.746	10.5411	0.72408	0.0253294	0.250591
Jan 2020	SLS		QD2-5r_2_01	2474.1	0.6388	2469.63	0.3059	1.7512	2474.13	0.337	0.2844	2476.95	0.1407	7.593	2481.73	3.708	10.2674	0.739525	0.0276993	0.232776
Jan 2020	SLS		QD2-5r_2_02	2474.51	0.6395	2469.64	0.2979	1.873	2474.1	0.347	0.2284	2477.02	0.1368	7.69	2481.74	3.79	10.4309	0.737233	0.0218965	0.240871
Jan 2020	SLS		QD2-5r_2_03	2474.76	0.6893	2469.64	0.301	2.0824	2474.3	0.3793	0.1897	2477.22	0.1375	7.729	2481.73	3.788	10.6904	0.722985	0.0177449	0.25927
Jan 2020	SLS	1.75	QD6-4_1_01	2473.95	0.2219	2470	0.1128	1.949	2474.57	0.2911	0.1054	2477.23	0.097	8.6214	2481.74	4.181	10.8977	0.791121	0.00967177	0.199207
Jan 2020	SLS		QD6-4_1_02	2473.47	0.1349	2470.01	0.0733	1.6891	2474	0.2671	0.1707	2477.1	0.1152	8.3284	2481.73	4.0876	10.3231	0.806773	0.0165357	0.176691
Jan 2020	SLS		QD6-4_1_03	2473.63	0.3191	2470.1	0.1468	1.4773	2474.15	0.2581	0.1499	2477	0.1109	8.4313	2481.73	4.1725	10.3776	0.812452	0.0144446	0.173104
Jan 2020	SLS		QD6-4_2_01	2473.4	0.2152	2469.87	0.111	1.408	2474.25	0.2212	0.1084	2477.3	0.1012	8.1406	2481.73	4.0143	9.8722	0.824598	0.0109803	0.164421
Jan 2020	SLS		QD6-4_2_03	2474.73	0.3908	2469.93	0.1581	2.2714	2474.02	0.355	0.1311	2477.3	0.1158	8.8232	2481.73	4.342	11.6165	0.75954	0.0112857	0.229174
Jan 2020	SLS		QD6-4_2_04	2473.11	0.1625	2469.82	0.0872	1.2262	2473.41	0.2074	0.2181	2477	0.1224	8.4367	2481.73	4.1713	10.0435	0.840016	0.0217155	0.138269
Jan 2020	SLS		QD6-4_2_05	2474.55	0.2708	2470.1	0.1247	2.4814	2473.98	0.3681	0.0969	2477.3	0.1084	8.6441	2481.73	4.2424	11.4932	0.752106	0.00843107	0.239463
Jan 2020	SLS	1	QD1-4_1_01	2474.69	0.8509	2470.05	0.3955	5.2827	2474.87	0.6001				2.1967	2481.73	1.0814	8.3303	0.2637	0	0.7363
Jan 2020	SLS		QD1-4_1_03	2474.54	1.2277	2470.29	0.4606	5.0953	2475.74	0.6882				2.2933	2481.73	1.1196	8.6163	0.266158	0	0.733842
Jan 2020	SLS		QD1-4_1_04	2474.37	1.0429	2470.02	0.4559	5.3485	2475.27	0.6691				2.2434	2481.7	1.0817	8.6348	0.259809	0	0.740191
Jan 2020	SLS		QD1-4_1_05	2475.6	0.9103	2469.99	0.4427	5.8704	2475.59	0.6959				2.4083	2481.72	1.1054	9.189	0.262085	0	0.737915
Jan 2020	SLS		QD1-4_1_06	2475.58	1.074	2469.99	0.4861	6.1389	2475.24	0.7449				2.3463	2481.74	1.1208	9.5592	0.245449	0	0.754551
Jan 2020	SLS	0.5	QD3-5_1_01	2475.5	0.9403	2469.97	0.4244	6.658	2475.5	0.7603				1.9145	2481.74	0.9165	9.5128	0.201255	0	0.798745
Jan 2020	SLS		QD3-5_1_02	2474.43	0.9937	2469.93	0.4447	5.4586	2475.15	0.6654				1.8473	2481.73	0.8652	8.2996	0.222577	0	0.777423
Jan 2020	SLS		QD3-5_1_04	2475.32	0.8848	2469.95	0.4006	6.0142	2475.48	0.7183				1.9178	2481.72	0.8897	8.8168	0.217517	0	0.782483
Jan 2020	SLS		QD3-5_1_06	2475.69	0.5817	2470.1	0.2732	5.0213	2475.3	0.6104				4.7044	2481.77	2.0434	10.3074	0.45641	0	0.54359
Jan 2020	SLS		QD3-5_2_08	2475.61	0.8091	2470.09	0.3661	6.6852	2474.14	0.8919				3.0021	2481.75	1.3352	10.4964	0.286012	0	0.713988
Jan 2020	SLS	0	QD4-6_1_01	2475.45	1.1573	2470.13	0.5488	6.3582	2475.72	0.7857				2.1492	2481.69	0.9878	9.6647	0.222376	0	0.777624
Jan 2020	SLS		QD4-6_1_02	2474.61	1.1325	2470.08	0.5578	6.3791	2475.63	0.7506				1.88147	2481.72	0.9432	9.39307	0.200304	0	0.799696
Jan 2020	SLS		QD4-6_1_03	2474.23	1.3934	2470.1	0.6476	5.7468	2474.93	0.6957				1.6782	2481.7	0.8068	8.8184	0.190307	0	0.809693
Jan 2020	SLS		QD4-6_1_04	2475.18	1.3865	2470.09	0.6555	6.886	2475.46	0.8356				1.7401	2481.74	0.84	10.0126	0.173791	0	0.826209
Jan 2020	SLS		QD4-6_1_05	2474.63	1.2341	2470.09	0.6028	6.1462	2475.08	0.735				1.6541	2481.68	0.8352	9.0344	0.183089	0	0.816911
Jan 2020	SLS		QD4-6_1_07	2475.25	1.341	2470.14	0.6276	6.7661	2475.01	0.8478				1.9927	2481.7	0.9955	10.0998	0.197301	0	0.802699
Jan 2020	SLS	-0.7	QD7-3_1_01	2475.61	1.4791	2470.06	0.7083	6.7506	2475.55	0.8112				1.1343	2481.72	0.5643	9.364	0.121134	0	0.878866
Jan 2020	SLS		QD7-3_1_02	2475.83	1.3467	2470.1	0.6471	6.7115	2475.71	0.7981				1.2315	2481.72	0.6142	9.2897	0.132566	0	0.867434
Jan 2020	SLS		QD7-3_1_03	2475.41	1.3126	2470.08	0.6572	6.6343	2476	0.7883				1.3511	2481.77	0.6749	9.298	0.145311	0	0.854689
Jan 2020	SLS		QD7-3_2_04	2474.86	1.539	2470.04	0.7314	5.9391	2475.6	0.7467				1.137	2481.73	0.5949	8.6151	0.131978	0	0.868022
Jan 2020	SLS		QD7-3_2_05	2474.61	1.6482	2469.99	0.7807	5.7875	2474.52	0.6906				0.8648	2481.72	0.4756	8.3005	0.104186	0	0.895814
Jan 2020	SLS		QD7-3_2_06	2474.52	2.1227	2469.89	0.9325	5.4503	2475.69	0.6839				0.3186	2481.75	0.1834	7.8916	0.040372	0	0.959628
Jan 2020	SLS		QD7-3_2_07	2474.71	2.1237	2469.88	0.9364	5.7869	2475.81	0.6997				0.258	2481.82	0.1561	8.1686	0.0315844	0	0.968416
Feb 2020	APS	3.3	QD2-5_1_gl05_scan1	2475.44							0.8162	2477.4	0.5169	9.5902	2481.85	4.6655	10.4064	0.921567	0.0784325	0
Feb 2020	APS		QD2-5_1_gl05_scan2	2475.13	0.4212	2469.11	0.2199	1.686	2474.48	0.3148	0.339	2477.43	0.2701	7.9123	2481.86	3.8236	10.3585	0.763846	0.0327267	0.203427
Feb 2020	APS		QD2-5_3_gl01_scan1	2475.47	0.19	2469.04	0.0996	0.9551	2474.79	0.1922	0.4524	2477.43	0.3245	7.569	2481.84	3.761	9.1665	0.825724	0.0493536	0.124922
Feb 2020	APS		QD2-5_3_gl01_scan2	2475.38	0.4038	2469.28	0.2177	1.9236	247454	0.3716	0.3285	2477.25	0.2478	7.1358	2481.78	3.511	9.7917	0.72876	0.0335488	0.237691
Feb 2020	APS		QD2_5_3_gl02_scan1	2475.11	0.1075	2468.97	0.0743	0.5701	2475.1	0.1308	0.4526	2477.38	0.3591	7.9135	2481.85	3.94	9.0437	0.875029	0.0500459	0.0749251
Feb 2020	APS		QD2_5_3_gl02_scan2	2475.19	0.3861	2469.36	0.1943	1.679	2474.69	0.3383	0.2619	2477.37	0.1952	6.6986	2481.85	3.301	9.0256	0.742178	0.0290175	0.228805
Feb 2020	APS		QD2_5_3_gl06_scan1	2475.07	0.2142	2468.95	0.1017	0.583	2474.45	0.1201	0.5956	2477.39	0.4302	9.022	2481.85	4.457	10.4148	0.866267	0.0571878	0.0765449
Feb 2020	APS		QD2_5_3_gl06_scan2	2474.97	0.42928	2469.3	0.206	1.565	2474.56	0.3268	0.4177	2477.36	0.2715	7.433	2481.86	3.643	9.84498	0.755004	0.0424277	0.202568
Feb 2020	APS		QD2_5_3_gl07_scan1	2475.83	0.2298	2468.88	0.1047	0.9171	2474.01	0.177	0.561	2477.38	0.38148	8.1505	2481.84	4.037	9.8584	0.826757	0.0569058	0.116337
Feb 2020	APS		QD2_5_3_gl07_scan2	2475.22	0.4348	2469.24	0.2332	1.6907	2474.53	0.3397	0.3373	2477.33	0.2154	7.0146	2481.85	3.463	9.4774	0.74014	0.0355899	0.22427
Feb 2020	APS	1.75	QD6_4_gl01_scan1	2475.19				2.0073	2473.78	0.3248	0.4764	2477.45	0.248	8.141	2481.85	4.0139	10.6247	0.766233	0.0448389	0.188928
Feb 2020	APS		QD6_4_gl01_scan2	2475.35				2.808	2475.2	0.3827				7.997	2481.86	4.006	10.805	0.74012	0	0.25988
Feb 2020	APS		QD6_4_gl06_scan1	2474.89				2.6367	2473.58	0.3885	0.4575	2477.26	0.2661	8.833	2481.86	4.344	11.9272	0.740576	0.0383577	0.221066
Feb 2020	APS		QD6_4_gl06_scan2	2474.78				2.5195	2474.06	0.3476	0.156	2477.59	0.1747	7.688	2481.85	3.797	10.3635	0.741834	0.0150528	0.243113
Feb 2020	APS	1	QD1_4_gl01_scan1	2476.58	0.936	2470.22	0.4206	7.9503	2475.88	1.0432				1.7969	2481.89	0.9348	10.6832	0.168199	0	0.831801
Feb 2020	APS		QD1_4_gl01_scan2	2476.58	1.114	2470.34	0.4566	8.2961	2475.91	1.1043				2.5459	2481.66	1.141	11.956	0.212939	0	0.787061
Feb 2020	APS		QD1_4_gl05_scan1	2476.41	0.50977	2469.98	0.3092	6.7014	2475.62	0.7979				1.108	2481.92	0.5759	8.31917	0.133186	0	0.866814
Feb 2020	APS		QD1_4_gl05_scan2	2476.51	1.149	2470.33	0.438	6.154	2475.88	0.7678				1.4418	2481.87	0.699	8.7448	0.164875	0	0.835125
Feb 2020	APS	0.5	QD3_5_gl01_scan1	2476.55	0.6537	2470.51	0.2685	7.231	2475.88	0.9304				1.1175	2481.89	0.5455	9.0022	0.124136	0	0.875864
Feb 2020	APS		QD3_5_gl01_scan2	2475.68	0.7819	2470.38	0.2926	6.261	2475.58	0.8807				2.018	2481.85	0.8537	9.0609	0.222715	0	0.777285
Feb 2020	APS		QD3_5_gl06_scan1	2475.7	0.643	2470.19	0.3915	7.981	2475.55	0.9666				1.136	2481.92	0.5616	9.76	0.116393	0	0.883607
Feb 2020	APS		QD3_5_gl06_scan2	2475.59	1.138	2470.47	0.3846	6.838	2475.83	0.9285				1.6096	2481.84	0.7684	9.5856	0.167919	0	0.832081
Feb 2020	APS		QD3_5_gl07_scan1	2475.91	1.016	2470.83	0.2728	7.3623	2475.81	0.964				1.22	2481.82	0.5685	9.5983	0.127106	0	0.872894
Feb 2020	APS		QD3_5_gl07_scan2	2475.39	0.8773	2470.51	0.3159	5.0996	2475.67	0.7263				1.4913	2481.82	0.7195	7.4682	0.199687	0	0.800313
Feb 2020	APS	0	QD4-6_gl06_scan1	2474.96	1.4423	2470.32	0.6705	7.182	2475.4	0.9989				0.6866	2481.97	0.3998	9.3109	0.0737415	0	0.926258
Feb 2020	APS		QD4-6_gl06_scan2	2475.47	0.7753	2470.29	0.3316	5.2829	2475.63	691				0.59105	2481.85	0.3747	6.64925	0.0888897	0	0.91111
Feb 2020	APS		QD4_6_gl01_scan1	2475.77	1.7599	2470.33	1.012	11.6427	2475.74	1.482				1.081	2482.08	0.65	14.4836	0.0746361	0	0.925364
Feb 2020	APS		QD4_6_gl01_scan2	2475.75	1.105	2470.37	0.5464	6.5045	2475.45	0.8088				0.7797	2481.8	0.3737	8.3892	0.0929409	0	0.907059
Feb 2020	APS	-0.7	QD7_3_gl01_scan1	2474.3	1.009	2470.22	0.6189	7.0227	2475.82	0.799				0.6117	2481.78	0.364	8.6434	0.0707708	0	0.929229
Feb 2020	APS		QD7_3_gl01_scan2	2475.9	1.214	2470.29	0.661	6.753	2475.33	0.846				1.228	2481.78	0.6753	9.195	0.133551	0	0.866449
Feb 2020	APS		QD7_3_gl06_scan1	2475.59	0.9329	2470.18	0.572	6.839	2475.36	0.7799				0.6796	2481.69	0.3706	8.4515	0.0804118	0	0.919588
Feb 2020	APS		QD7_3_gl06_scan2	2475.05	1.5155	2470.32	0.7685	6.239	2475.6	0.728				1.1694	2481.91	0.6609	8.9239	0.131041	0	0.868959
Dec 2021	APS	2.08	QD9-3_1-1	2475.51				0.958	2475.16	0.135	0.505	2477.38	0.417	10.9	2481.77	5.41	12.363	0.881663	0.0408477	0.0774893
Dec 2021	APS		QD9-3_1-2	2475.57				2.61	2475.14	0.309	0.24	2477.3	0.253	10.246	2481.78	5.07	13.096	0.782376	0.0183262	0.199297
Dec 2021	APS		QD9-3_2-1	2475.63				0.768	2475.23	0.184	0.764	2477.6	0.355	9.02	2481.76	4.42	10.552	0.854814	0.0724033	0.0727824
Dec 2021	APS		QD9-3_2-2	2475.6				2.36	2475.34	0.311	0.293	2477.44	0.115	9.315	2481.8	4.55	11.968	0.778326	0.024482	0.197193
Dec 2021	APS		QD9-3_3-1	2475.67				1.75	2475.25	0.181	0.46	2477.44	0.334	9.81	2481.79	4.8	12.02	0.81614	0.0382696	0.145591
Dec 2021	APS		QD9-3_3-2	2475.38				2.86	2475.37	0.312	0.204	2477.14	0.204	10.06	2481.8	4.89	13.124	0.766535	0.015544	0.217921
Dec 2021	APS		QD9-3_4-1	2475.42				0.8	2475.25	0.15	0.483	2477.44	0.357	11.18	2481.77	5.48	12.463	0.897055	0.0387547	0.06419
Dec 2021	APS		QD9-3_4-2	2475.51				2.36	2475.12	0.312	0.451	2477.14	0.298	11.79	2481.79	5.86	14.601	0.807479	0.0308883	0.161633
Dec 2021	APS		QD9-3_5-1	2475.4				1.94	2475.17	0.186	0.45	2477.42	0.335	9.99	2481.77	5.05	12.38	0.806947	0.0363489	0.156704
Dec 2021	APS		QD9-3_5-2	2475.35				3.16	2475.15	0.29	0.31	2477.14	0.23	9.74	2481.8	4.77	13.21	0.73732	0.0234671	0.239213
Dec 2021	APS	1.54	QD6-5_1-1	2475.74	0.7144	2470.03	0.3013	3.0259	2475.32	0.4001	0.1151	2477.14	0.092	6.032	2481.8	3.097	9.8874	0.610069	0.0116411	0.37829
Dec 2021	APS		QD6-5_1-2	2475.58	0.784	2470.04	0.3423	3.571	2475.34	0.4836	0.069	2477.4	0.07	5.467	2481.79	2.766	9.891	0.552725	0.00697604	0.440299
Dec 2021	APS		QD6-5_2-1	2475.58	0.805	2470.02	0.377	5.23	2475.14	0.588	0.2458	2477.44	0.141	3.527	2481.78	1.81	9.8078	0.359612	0.0250617	0.615327
Dec 2021	APS		QD6-5_2-2	2475.4	0.9305	2470.13	0.437	4.924	2475.54	0.631	0.118	2477.24	0.101	3.996	2481.78	2.425	9.9685	0.400863	0.0118373	0.5873
Dec 2021	APS		QD6-5_3-1	2475.42	1.64	2469.74	0.753	5.657	2475.85	0.523				5.361	2481.76	2.83	12.658	0.423527	0	0.576473
Dec 2021	APS		QD6-5_3-2	2475.76	1.503	2469.76	0.704	5.728	2476.7	0.496				6.512	2481.75	3.56	13.743	0.473841	0	0.526159
Dec 2021	APS		QD6-5_4-1	2475.36	0.975	2470.02	0.456	5.35	2475.37	0.613	0.071	2477.14	0.106	3.846	2481.78	2.014	10.242	0.375513	0.00693224	0.617555
Dec 2021	APS		QD6-5_4-2	2475.58	0.904	2470.02	0.416	5.43	2475.34	0.62	0.206	2477.46	0.106	3.41	2481.76	1.82	9.95	0.342714	0.0207035	0.636583
Dec 2021	APS		QD6-5_5-1	2475.63	1.03	2469.99	0.464	5.53	2475.24	0.65	0.252	2477.14	0.134	4.053	2481.78	2.075	10.865	0.373033	0.0231937	0.603774
Dec 2021	APS		QD6-5_5-2	2475.3	1.04	2470.06	0.465	5.77	2475.27	0.67				3.888	2481.8	2.02	10.698	0.363432	0	0.636568
Dec 2021	APS	1.48	QD8-4v2_1	2475.46	0.61	2470.23	0.292	5.73	2475.29	0.657	0.266	2477.42	0.177	5.14	2481.79	2.63	11.746	0.437596	0.022646	0.539758
Dec 2021	APS		QD8-4v2_2	2475.6	0.943	2470.58	0.342	6.12	2475.14	0.774				4.734	2481.77	2.31	11.797	0.401288	0	0.598712
Dec 2021	APS		QD8-4v2_3	2475.68	0.491	2470.23	0.234	5.53	2475.23	0.652				5.6	2481.79	2.97	11.621	0.481886	0	0.518114
Dec 2021	APS		QD8-4v2_4	2475.64	0.715	2470.23	0.362	6.8	2475.13	0.783				5.31	2481.8	2.69	12.825	0.414035	0	0.585965
Dec 2021	APS		QD8-4v2_5	2475.47	0.693	2470.26	0.292	6.09	2475.4	0.72	0.153	2477.3	0.277	6.41	2481.75	3.33	13.346	0.480294	0.0114641	0.508242
Dec 2021	APS		QD8-4v2_all5m	2475.77	0.568	2470.23	0.28	6.174	2475.32	0.706	0.127	2477.14	0.118	5.22	248178	2.67	12.089	0.431798	0.0105054	0.557697
Nov 2020	NSLS-II	3.3	QD2-5_gl7_100m	2477.29							0.7525	2475.72	0.4915	15.7191	2480.14	7.974	16.4716	0.954315	0.0456847	0
Nov 2020	NSLS-II		QD2-5_gl7_first50	2477.42							0.6678	2475.64	0.439	17.5592	2480.16	8.982	18.227	0.963362	0.036638	0
Nov 2020	NSLS-II		QD2-5_gl7_last50	2477.18							1.109	2475.73	0.6527	16.8048	2480.13	8.2507	17.9138	0.938092	0.0619076	0
Nov 2020	NSLS-II		QD2_5_7_first15scansPN	2479.27							0.4476	2477.85	0.3078	21.4546	2482.22	11.064	21.9022	0.979564	0.0204363	0
Nov 2020	NSLS-II		QD2_5_7_last15scansPN	2479.03				0.652	2474.64	0.249	2.145	2477.69	1.11	18.669	2482.15	9.49	21.466	0.869701	0.0999255	0.0303736
Nov 2020	NSLS-II		QD2-5_gl7_first25m	2477.53							0.595	2475.91	0.341	17.984	2480.18	9.11	18.579	0.967975	0.0320254	0
Nov 2020	NSLS-II	1.75	QD6-4_gl12b	2476.73							0.329	2475.67	0.4004	14.7017	2480.26	7.05	15.0307	0.978111	0.0218885	0
Nov 2020	NSLS-II		QD6-4_gl12c	2476.63							0.7238	2475.47	0.3886	10.0224	2480.26	5.241	10.7462	0.932646	0.067354	0
Nov 2020	NSLS-II		QD6_4_12gl_first15scansPN	2479.06				1.435	2475.6	0.114	0.1203	2477.7	0.187	10.718	2482.29	5.028	12.2733	0.873278	0.00980176	0.11692
Nov 2020	NSLS-II		QD6_4_12gl_last15scansPN	2478.91				3.771	2475.51	0.4011	0.3058	2477.32	0.317	8.298	2482.27	4.364	12.3748	0.670556	0.0247115	0.304732
Nov 2020	NSLS-II		QD6-4_12bgl_first3scans	2477.62							0.698	2477.65	0.172	7.85	2480.19	4.15	8.548	0.918343	0.0816565	0
Nov 2020	NSLS-II		QD6-4_12bgl_last3scans	2478.28				1.93	2474.35	0.476	0.708	2477	1.125	22.968	2480.26	11.42	25.606	0.896977	0.0276498	0.075373
Nov 2020	NSLS-II		QD6-4_12cgl_first3scans	2478.28							0.78	2475.83	0.428	7.21	2480.2	3.58	7.99	0.902378	0.097622	0
Nov 2020	NSLS-II		QD6-4_12cgl_last3scans	2477.62				4.29	2474.19	0.681				15.172	2480.35	6.88	19.462	0.77957	0	0.22043
Mar 2021	NSLS-II	2.08	QD9-4_1bin_first3scans	2477.91							0.397	2477.05	0.194	22.39	2480.91	11.55	22.787	0.982578	0.0174222	0
Mar 2021	NSLS-II		QD9-4_1bin_last3scans	2477.01				0.5618	2473.68	0.294				15.295	2480.84	7.87	15.8568	0.9646	0	0.0354
Mar 2021	NSLS-II		QD9-4_stepscan_01	2477.84							0.261	2476.62	0.137	15.98	2480.75	8.6	16.241	0.98393	0.0160704	0
Mar 2021	NSLS-II		QD9-4_stepscan_02	2477.89							0.683	2476.43	0.377	14.78	2480.76	7.46	15.463	0.95583	0.04417	0
Mar 2021	NSLS-II		QD9-4_stepscan_14	2477.91				1.58	2473.86	0.431	0.986	2476.63	0.585	11.94	2480.8	5.99	14.506	0.823108	0.0679719	0.10892
Mar 2021	NSLS-II	1.54	QD6-5_1bin_first20scans	2477.91	0.4588	2468.98	0.449	4.254	2475.32	0.472				5.056	2481.13	2.726	9.7688	0.517566	0	0.482434
Mar 2021	NSLS-II		QD6-5_2bin_first20scans	2477.88	0.741	2470.09	0.384	4.558	2475.58	0.824				6.315	2481.19	3.19	11.614	0.54374	0	0.45626
Mar 2021	NSLS-II		QD6-5_1bin_last20scans	2477.85	0.431	2470.17	0.856	9.39	2475.91	0.981				8.89	2481.29	4.07	18.711	0.475122	0	0.524878
Mar 2021	NSLS-II		QD6-5_2bin_last20scans	2477.84	0.396	2470.09	1.067	9.8745	2475.7	1.233				11.784	2481.22	5.692	22.0545	0.534313	0	0.465687
Mar 2021	NSLS-II	1.48	QD8-4_1bin_first20scans	2477.16	0.792	2468.89	0.853	11.703	2476.09	1.98	2.706	2471.02	1.92	16.44	2481.02	7.2	31.641	0.519579	0.0855219	0.394899
Mar 2021	NSLS-II		QD8-4_1bin_last20scans	2477.91				13.52	2475	2.034				11.54	2481.05	6.17	25.06	0.460495	0	0.539505
Mar 2021	NSLS-II		QD8-4_2bin_first20scans	2478.58	0.775	2470.14	0.622	4.866	2474.64	0.949				3.48	2480.9	1.93	9.121	0.381537	0	0.618463
