# Supplementary material for: Sulfur speciation in dacitic melts using X-ray absorption near-edge structure spectroscopy of the S K-edge (S-XANES): Consideration of radiation-induced changes and the implications for sulfur in natural arc systems
Source: publisher site journal article supplement (doi:10.2138/am-2022-8833), 2023-10-26

Supplementary Figure S1: Examples of X-ray fluorescence (XRF) maps of dacitic glasses analyzed at each beamline. Maps show the areas and spots where S-XANES spectra were obtained from. Note the colors of Si, P, and S are different for each map.

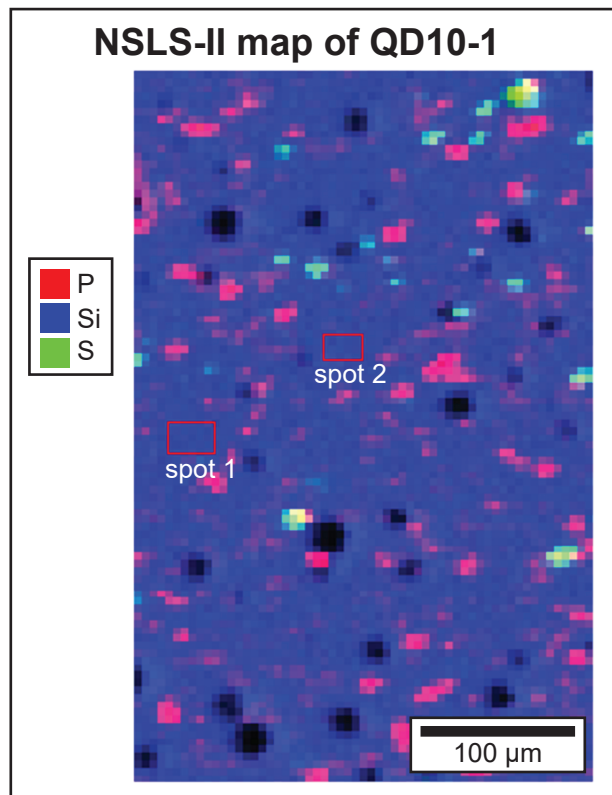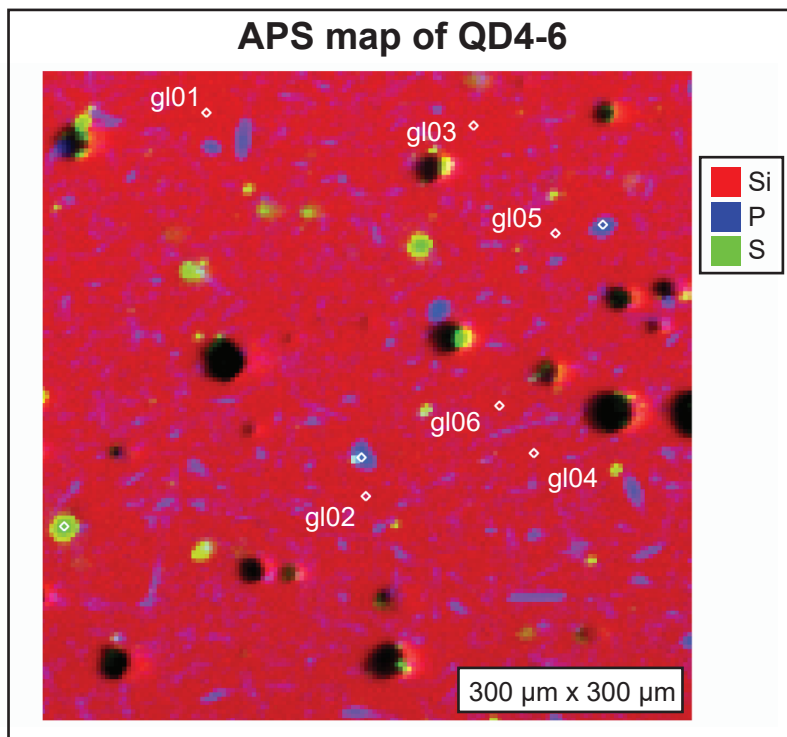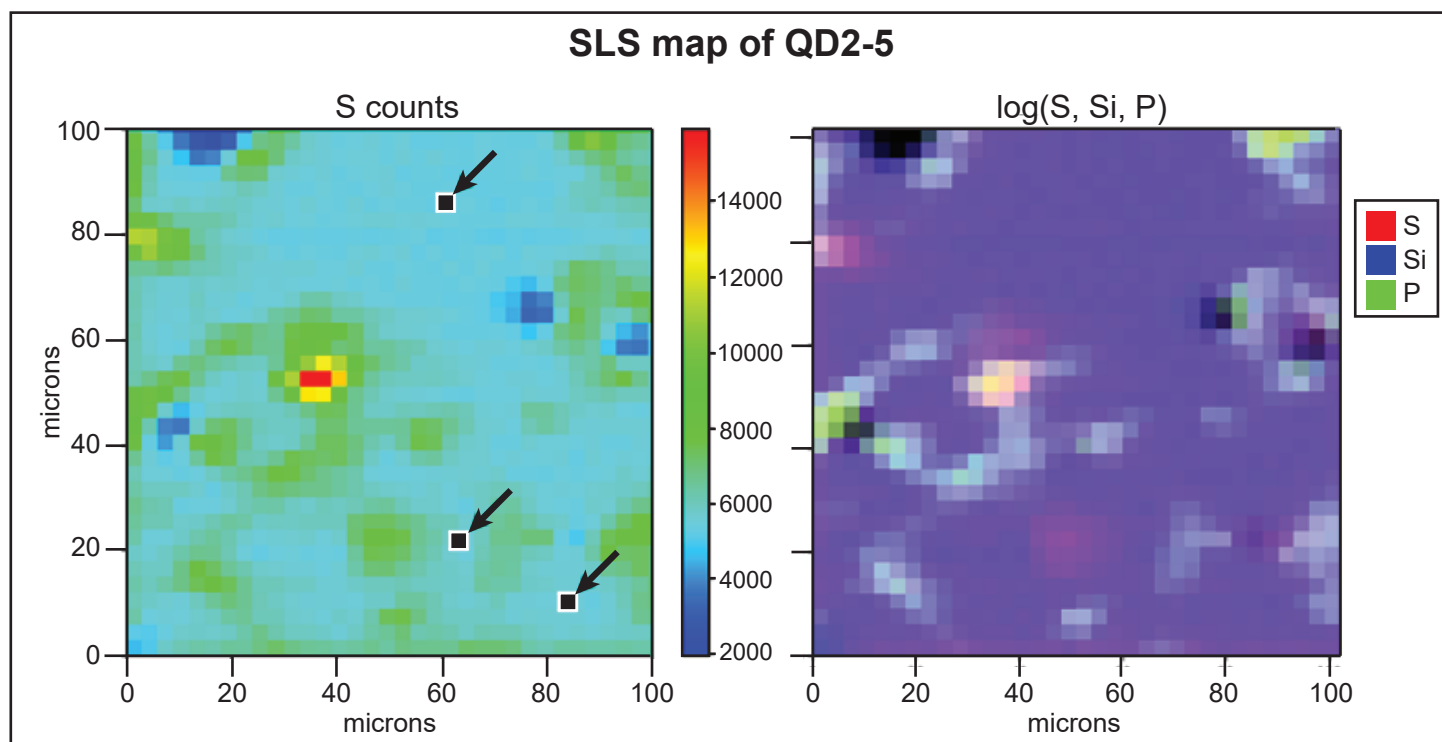

Supplement: Supplementary file 1 [file am-2022-8833_sm.zip]
